# Supplementary material for: Prevalence and Cost of Antipsychotic Prescribing, within the Context of Psycholeptic Prescribing, in the Irish Setting
Source: MDPI journal article supplement (doi:10.3390/healthcare12030338), 2024-01-29
Supplement: s1 [file s1]

Supplementary Table S1. Drug Payment Scheme Thresholds (April 2019 - March 2022)

| <b>Drugs Payment Scheme Thresholds</b> |                        |
|----------------------------------------|------------------------|
| <b>Dates when threshold applied</b>    | <b>Threshold Limit</b> |
| 1 April 2019 to 1 November 2020        | €124                   |
| 1 November 2020 to 1 January 2022      | €114                   |
| 1 January 2022 to 1 March 2022         | €100                   |
| Since 1 March 2022                     | €80                    |

Reference:

Citizensinformation.ie. Drugs Payment Scheme [Internet]. Citizensinformation.ie; [cited 2023 Feb 8]. Available from:  
[https://www.citizensinformation.ie/en/health/drugs\\_and\\_medicines/drugs\\_payment\\_scheme.html](https://www.citizensinformation.ie/en/health/drugs_and_medicines/drugs_payment_scheme.html)

**Supplementary Table S2.** GMS data per month over 32 months (Jan 2020-Aug 2022) for total costs (€), costs per example drug (€), number of patients per example drug, and total number of prescription items, and number of prescription items per example drug.

| Variable                                  | Obs | Mean        | Std. Dev. | Min        | Max        |
|-------------------------------------------|-----|-------------|-----------|------------|------------|
| Total Cost                                | 32  | €4436469.18 | 121404.35 | 4146865.39 | 4656163.24 |
| Total Cost Paliperidone                   | 32  | €608034.06  | 26534.54  | 554079.47  | 676078.57  |
| Total Cost Quetiapine                     | 32  | €553411.53  | 20463.12  | 494866.39  | 583840.08  |
| Total Cost Olanzapine                     | 32  | €488929.26  | 12974.68  | 450696.25  | 513404.44  |
| Total Cost Aripiprazole                   | 32  | €364749.51  | 15373.01  | 328806.57  | 394876.23  |
| No. of patients Paliperidone              | 32  | 1209.38     | 131.54    | 734.50     | 1300.00    |
| No. of patients Quetiapine                | 32  | 27342.88    | 3304.53   | 16198.50   | 30282.00   |
| No. of patients Olanzapine                | 32  | 16711.69    | 1874.16   | 9682.50    | 17648.00   |
| No. of patients Aripiprazole              | 32  | 5455.78     | 641.95    | 3193.50    | 6008.00    |
| Total No. of Prescription items           | 32  | 282792.62   | 7597.73   | 267412.00  | 297606.00  |
| No. of prescription items<br>Paliperidone | 32  | 1443.88     | 59.59     | 1310.00    | 1535.00    |
| No. of prescription items<br>Quetiapine   | 32  | 33908.59    | 1750.65   | 29507.00   | 36921.00   |
| No. of prescription items<br>Olanzapine   | 32  | 20431.16    | 543.10    | 18823.00   | 21346.00   |
| No. of prescription items<br>Aripiprazole | 32  | 6536.12     | 326.46    | 5797.00    | 7117.00    |

**Supplementary Table S3.** DPS data per month over 32 months (Jan 2020-Aug 2022) for total costs (€), costs per example drug (€), number of patients per example drug and total number of prescription items, and number of prescription items per example drug.

| Variable                                  | Obs | Mean       | Std. Dev. | Min       | Max       |
|-------------------------------------------|-----|------------|-----------|-----------|-----------|
| Total Cost                                | 32  | €369154.13 | 43322.88  | 313912.50 | 462896.51 |
| Total Cost Paliperidone                   | 32  | €38039.59  | 4199.23   | 28979.84  | 48260.63  |
| Total Cost Quetiapine                     | 32  | €48950.07  | 7178.41   | 38879.74  | 65899.58  |
| Total Cost Olanzapine                     | 32  | €32830.64  | 5139.53   | 26894.09  | 45455.76  |
| Total Cost Aripiprazole                   | 32  | €35782.18  | 5091.99   | 28498.93  | 45867.46  |
| No. of patients Paliperidone              | 32  | 79.44      | 10.28     | 52.00     | 96.00     |
| No. of patients Quetiapine                | 32  | 2577.69    | 605.92    | 1495.00   | 3770.00   |
| No. of patients Olanzapine                | 32  | 1460.03    | 306.96    | 888.50    | 2080.00   |
| No. of patients Aripiprazole              | 32  | 543.50     | 131.00    | 320.50    | 816.00    |
| Total No. of Prescription items           | 32  | 30637.44   | 4334.72   | 25698.00  | 40041.00  |
| No. of prescription items<br>Paliperidone | 32  | 94.31      | 9.83      | 80.00     | 115.00    |
| No. of prescription items<br>Quetiapine   | 32  | 3229.81    | 610.73    | 2396.00   | 4555.00   |
| No. of prescription items<br>Olanzapine   | 32  | 1832.53    | 316.56    | 1473.00   | 2534.00   |
| No. of prescription items<br>Aripiprazole | 32  | 672.72     | 136.41    | 526.00    | 988.00    |
